# Supplementary material for: Preferences and Willingness to Pay for Physical Activity: A Discrete Choice Experiment Study
Source: Research Square preprint supplement (doi:10.21203/rs.3.rs-7614264/v1), 2025-10-03
Supplement: Supplementary file 1 [file f83e7a2491479313e9f98849.docx]

Table 1. WTP for Each Scenario Used in our Study

| PA Type | Proximity | Companions | PA Time | WTP |
| --- | --- | --- | --- | --- |
| Swimming | At Home/Work | Family Members | Evening | 26.11 |
| Swimming | At Home/Work | Family Members | Morning | 24.13 |
| Swimming | Near Home/Work | Family Members | Weekend | 23.46 |
| Swimming | Near Home/Work | Friends | Evening​ | 22.19 |
| Walking/Running | At Home/Work | Friends | Evening | 22.03 |
| Walking/Running | At Home/Work | Family Members | Evening | 21.49 |
| Cycling | At Home/Work | Friends | Weekend | 19.32 |
| Cycling | At Home/Work | Friends | Weekend | 19.32 |
| Swimming | Away Home/Work | Family Members | Weekend | 19.11 |
| Swimming | At Home/Work | Friends | Morning | 17.10 |
| Walking/Running | Near Home/Work | Family Members | Evening | 17.03 |
| Swimming | At Home/Work | Colleagues | Evening | 16.11 |
| Walking/Running | Near Home/Work | Friends | Morning | 15.59 |
| Walking/Running | Near Home/Work | Family Members | Morning | 15.05 |
| Cycling | At Home/Work | Family Members | Morning | 14.99 |
| Strength Training | At Home/Work | Friends | Morning | 13.84 |
| Walking/Running | At Home/Work | Colleagues | Weekend | 13.31 |
| Swimming | Near Home/Work | Friends | Morning | 12.64 |
| Swimming | Near Home/Work | Family Members | Morning | 12.10 |
| Swimming | At Home/Work | Alone | Morning | 11.53 |
| Walking/Running | At Home/Work | Colleagues | Evening | 11.49 |
| Strength Training | Near Home/Work | Friends | Evening | 11.35 |
| Strength Training | Near Home/Work | Friends | Evening | 11.35 |
| Walking/Running | Away Home/Work | Friends | Morning | 11.24 |
| Cycling | Away Home/Work | Friends | Weekend | 10.51 |
| Swimming | Away Home/Work | Colleagues | Weekend | 9.11 |
| Cycling | Away Home/Work | Friends | Evening | 8.69 |
| Swimming | Away Home/Work | Friends | Morning | 8.29 |
| Strength Training | Away Home/Work | Family Members | Weekend | 8.28 |
| Cycling | Away Home/Work | Family Members | Evening | 8.15 |
| Cycling | Away Home/Work | Family Members | Evening | 8.15 |
| Swimming | Away Home/Work | Family Members | Morning | 7.75 |
| Cycling | At Home/Work | Family Members | Morning | 7.42 |
| Swimming | Away Home/Work | Colleagues | Evening | 7.30 |
| Strength Training | At Home/Work | Colleagues | Weekend | 7.10 |
| Swimming | Away Home/Work | Alone | Weekend | 6.51 |
| Strength Training | Away Home/Work | Family Members | Evening | 6.46 |
| Walking/Running | Near Home/Work | Alone | Weekend | 6.24 |
| Cycling | At Home/Work | Alone | Weekend | 6.18 |
| Walking/Running | Near Home/Work | Alone | Evening | 4.42 |
| Cycling | Near Home/Work | Colleagues | Weekend | 4.32 |
| Walking/Running | Away Home/Work | Friends | Morning | 3.67 |
| Strength Training | At Home/Work | Colleagues | Morning | 3.31 |
| Cycling | Near Home/Work | Colleagues | Evening | 2.51 |
| Cycling | At Home/Work | Alone | Morning | 2.39 |
| Walking/Running | At Home/Work | Colleagues | Morning | 1.95 |
| Walking/Running | At Home/Work | Colleagues | Morning | 1.95 |
| Walking/Running | Away Home/Work | Alone | Weekend | 1.89 |
| Ball Sports | At Home/Work | Family Members | Weekend | 1.78 |
| Cycling | Near Home/Work | Alone | Weekend | 1.72 |
| Strength Training | Near Home/Work | Family Members | Morning | 1.27 |
| Walking/Running | Away Home/Work | Colleagues | Morning | 0.70 |
| Cycling | Near Home/Work | Colleagues | Morning | 0.53 |
| Strength Training | Near Home/Work | Alone | Weekend | 0.03 |
| Ball Sports | At Home/Work | Friends | Morning | -1.48 |
| Cycling | Near Home/Work | Alone | Morning | 2.07 |
| Ball Sports | Near Home/Work | Friends | Weekend | -2.15 |
| Strength Training | Away Home/Work | Friends | Morning | -2.54 |
| Ball Sports | Near Home/Work | Friends | Evening | -3.96 |
| Strength Training | Away Home/Work | Alone | Weekend | -4.32 |
| Ball Sports | Near Home/Work | Family Members | Evening | -4.50 |
| Swimming | Away Home/Work | Alone | Morning | -4.85 |
| Strength Training | Away Home/Work | Colleagues | Morning | -5.51 |
| Strength Training | Away Home/Work | Alone | Evening | -6.14 |
| Strength Training | At Home/Work | Alone | Morning | -6.87 |
| Strength Training | At Home/Work | Alone | Morning | -6.87 |
| Ball Sports | At Home/Work | Colleagues | Weekend | -8.22 |
| Strength Training | Near Home/Work | Colleagues | Morning | -8.73 |
| Ball Sports | At Home/Work | Friends | Morning | -9.04 |
| Walking/Running | Away Home/Work | Alone | Morning | -9.47 |
| Ball Sports | Away Home/Work | Family Members | Morning | -10.83 |
| Cycling | Away Home/Work | Colleagues | Morning | -11.39 |
| Ball Sports | Near Home/Work | Family Members | Morning | -14.05 |
| Ball Sports | Near Home/Work | Colleagues | Morning | -16.48 |
| Ball Sports | Near Home/Work | Alone | Evening | -17.10 |
| Ball Sports | Away Home/Work | Colleagues | Morning | -20.83 |
| Ball Sports | Away Home/Work | Alone | Evening | -21.46 |
| Ball Sports | Away Home/Work | Alone | Morning | -23.43 |
| Ball Sports | Near Home/Work | Alone | Morning | -26.65 |
| Ball Sports | Away Home/Work | Colleagues | Morning | -28.40 |

Due to the absence of heterogeneity among some variables, only certain levels were included in the mixed logit regression.

Table 2. The results of Mix Logit Model Regression

| Var. | Choice | Coefficient | S. Error | z | P>z | Conf. Interval 95% | |
| --- | --- | --- | --- | --- | --- | --- | --- |
| Age | Swimming | 0.003 | 0.119 | 0.03 | 0.978 | -0.231 | 0.237 |
| Strength Training | -0.179 | 0.101 | -1.77 | 0.077 | -0.378 | 0.019 |
| Cycling | -0.010 | 0.093 | -0.11 | 0.912 | -0.192 | 0.172 |
| Away Home/Work | 0.038 | 0.077 | 0.50 | 0.618 | -0.112 | 0.188 |
| Friends | -0.012 | 0.102 | -0.12 | 0.902 | -0.212 | 0.187 |
| Colleagues | 0.069 | 0.102 | 0.67 | 0.502 | -0.132 | 0.269 |
| Family Members | -0.035 | 0.099 | -0.35 | 0.724 | -0.229 | 0.159 |
| Gender | Swimming | 0.128 | 0.150 | 0.86 | 0.391 | -0.165 | 0.421 |
| Strength Training | 0.336 | 0.136 | 2.47 | 0.014 | 0.069 | 0.603 |
| Cycling | 0.468 | 0.133 | 3.51 | 0.000 | 0.207 | 0.730 |
| Away Home/Work | -0.258 | 0.101 | -2.56 | 0.010 | -0.456 | -0.061 |
| Friends | -0.129 | 0.130 | -0.99 | 0.323 | -0.384 | 0.126 |
| Colleagues | -0.418 | 0.143 | -2.92 | 0.003 | -0.699 | -0.138 |
| Family Members | -0.191 | 0.138 | -1.38 | 0.169 | -0.462 | 0.081 |
| Education | Swimming | -0.112 | 0.075 | -1.49 | 0.136 | -0.260 | 0.035 |
| Strength Training | -0.201 | 0.071 | -2.82 | 0.005 | -0.340 | -0.061 |
| Cycling | -0.015 | 0.066 | -0.23 | 0.818 | -0.145 | 0.115 |
| Away Home/Work | -0.046 | 0.051 | -0.90 | 0.369 | -0.147 | 0.055 |
| Friends | 0.178 | 0.068 | 2.62 | 0.009 | 0.045 | 0.311 |
| Colleagues | 0.095 | 0.077 | 1.23 | 0.217 | -0.056 | 0.246 |
| Family Members | 0.144 | 0.072 | 2.01 | 0.045 | 0.003 | 0.284 |
| Marital Status | Swimming | -0.008 | 0.160 | -0.05 | 0.962 | -0.320 | 0.305 |
| Strength Training | -0.166 | 0.133 | -1.25 | 0.212 | -0.428 | 0.095 |
| Cycling | 0.009 | 0.124 | 0.07 | 0.942 | -0.234 | 0.252 |
| Away Home/Work | -0.073 | 0.101 | -0.72 | 0.473 | -0.271 | 0.126 |
| Friends | 0.081 | 0.137 | 0.59 | 0.555 | -0.188 | 0.349 |
| Colleagues | 0.144 | 0.137 | 1.06 | 0.291 | -0.124 | 0.412 |
| Family Members | 0.324 | 0.133 | 2.44 | 0.014 | 0.064 | 0.584 |
| Income | Swimming | 0.171 | 0.082 | 2.08 | 0.037 | 0.010 | 0.332 |
| Strength Training | -0.038 | 0.076 | -0.50 | 0.619 | -0.187 | 0.111 |
| Cycling | 0.037 | 0.074 | 0.51 | 0.613 | -0.107 | 0.182 |
| Away Home/Work | -0.030 | 0.057 | -0.53 | 0.596 | -0.141 | 0.081 |
| Friends | 0.051 | 0.072 | 0.71 | 0.478 | -0.090 | 0.192 |
| Colleagues | 0.048 | 0.081 | 0.59 | 0.554 | -0.110 | 0.206 |
| Family Members | 0.123 | 0.076 | 1.62 | 0.104 | -0.025 | 0.272 |
| Income sat. | Swimming | 0.092 | 0.083 | 1.11 | 0.265 | -0.070 | 0.254 |
| Strength Training | -0.041 | 0.076 | -0.54 | 0.587 | -0.190 | 0.108 |
| Cycling | 0.066 | 0.072 | 0.93 | 0.353 | -0.074 | 0.207 |
| Away Home/Work | 0.181 | 0.056 | 3.25 | 0.001 | 0.072 | 0.290 |
| Friends | 0.068 | 0.072 | 0.95 | 0.344 | -0.073 | 0.210 |
| Colleagues | 0.036 | 0.081 | 0.45 | 0.652 | -0.122 | 0.195 |
| Family Members | 0.044 | 0.077 | 0.57 | 0.566 | -0.106 | 0.194 |
| PA Level | Swimming | 0.090 | 0.116 | 0.77 | 0.439 | -0.138 | 0.318 |
| Strength Training | 0.146 | 0.100 | 1.46 | 0.146 | -0.051 | 0.342 |
| Cycling | 0.033 | 0.095 | 0.35 | 0.727 | -0.153 | 0.220 |
| Away Home/Work | -0.081 | 0.077 | -1.05 | 0.295 | -0.233 | 0.071 |
| Friends | -0.004 | 0.098 | -0.04 | 0.969 | -0.196 | 0.188 |
| Colleagues | -0.001 | 0.098 | -0.01 | 0.994 | -0.192 | 0.191 |
| Family Members | 0.070 | 0.097 | 0.73 | 0.466 | -0.119 | 0.260 |
| WTP | Swimming | 0.060 | 0.048 | 1.25 | 0.210 | -0.034 | 0.154 |
| Strength Training | 0.108 | 0.040 | 2.72 | 0.007 | 0.030 | 0.186 |
| Cycling | 0.061 | 0.037 | 1.68 | 0.093 | -0.010 | 0.133 |
| Away Home/Work | 0.029 | 0.031 | 0.95 | 0.340 | -0.031 | 0.089 |
| Friends | 0.022 | 0.041 | 0.53 | 0.597 | -0.058 | 0.102 |
| Colleagues | -0.027 | 0.040 | -0.69 | 0.493 | -0.106 | 0.051 |
| Family Members | 0.015 | 0.039 | 0.38 | 0.705 | -0.062 | 0.091 |

Att. Lev.: Attribute Levels, M: Margin

Guide for tracking Att. Lev. Numbers: 1: PA Type, 2: Proximity, 3: Cost, 4: Companions, and 5: PA Time. The numbers related to each level of each attribute can be found in Table 1 of our article. P value for all results was ≅ 0.00, and Standard Error ≅ 0.01-0.03

Table 3. Probability of Choosing related to All scenarios

| Att. Lev. | M | z | Att. Lev. | M | z | Att. Lev. | M | z | Att. Lev. | M | z |
| --- | --- | --- | --- | --- | --- | --- | --- | --- | --- | --- | --- |
| 2 1 1 4 4 | 0.78 | 40.18 | 2 2 1 3 1 | 0.53 | 21.2 | 5 1 3 3 4 | 0.41 | 13.3 | 2 3 4 3 3 | 0.3 | 10.27 |
| 2 2 1 4 4 | 0.77 | 35.1 | 5 2 3 4 1 | 0.53 | 17.09 | 1 2 1 3 3 | 0.41 | 18.72 | 2 1 6 1 3 | 0.3 | 12.06 |
| 4 1 1 4 4 | 0.76 | 36.67 | 1 2 3 2 4 | 0.53 | 18.46 | 4 3 1 3 1 | 0.41 | 17.37 | 2 1 5 3 1 | 0.3 | 12.24 |
| 2 1 1 2 4 | 0.76 | 38.14 | 4 2 1 3 2 | 0.53 | 18.47 | 5 2 3 1 1 | 0.41 | 15.89 | 4 1 5 3 2 | 0.3 | 11.03 |
| 2 1 1 4 2 | 0.76 | 37.86 | 5 2 2 2 1 | 0.53 | 17.82 | 1 1 2 3 4 | 0.41 | 15.63 | 1 3 4 1 4 | 0.3 | 14.45 |
| 2 1 1 4 3 | 0.75 | 34.83 | 1 2 2 4 1 | 0.53 | 19.93 | 5 3 3 2 1 | 0.41 | 14.28 | 2 2 5 3 3 | 0.3 | 10.1 |
| 4 2 1 4 4 | 0.74 | 31.87 | 5 2 3 2 2 | 0.53 | 16.02 | 1 3 3 4 1 | 0.41 | 16.58 | 5 3 4 1 2 | 0.3 | 12.35 |
| 2 2 1 2 4 | 0.74 | 33.3 | 1 2 3 4 2 | 0.53 | 18.45 | 3 1 5 4 4 | 0.41 | 12.79 | 3 2 6 4 4 | 0.3 | 10.1 |
| 2 2 1 4 2 | 0.74 | 32.64 | 2 2 2 3 4 | 0.53 | 15.66 | 5 1 2 3 2 | 0.41 | 13.78 | 3 3 3 1 1 | 0.3 | 13.24 |
| 2 1 1 4 1 | 0.73 | 40.53 | 2 1 4 1 4 | 0.53 | 18.5 | 1 2 2 1 1 | 0.41 | 19.4 | 5 3 5 4 1 | 0.3 | 11.73 |
| 4 1 1 2 4 | 0.73 | 35.25 | 1 2 2 2 2 | 0.53 | 18.68 | 1 3 2 2 1 | 0.41 | 16.33 | 1 2 5 1 4 | 0.3 | 13.8 |
| 4 1 1 4 2 | 0.73 | 34.27 | 3 1 3 4 3 | 0.52 | 16.23 | 2 3 3 3 4 | 0.41 | 12.29 | 1 3 5 2 4 | 0.29 | 12.16 |
| 2 1 1 2 2 | 0.73 | 35.76 | 3 1 2 2 3 | 0.52 | 16.59 | 1 2 3 1 2 | 0.41 | 17.4 | 1 2 4 3 4 | 0.29 | 11.84 |
| 2 2 1 4 3 | 0.73 | 30.39 | 4 1 5 4 4 | 0.52 | 15.85 | 4 3 2 3 4 | 0.41 | 12.76 | 5 2 5 1 2 | 0.29 | 11.66 |
| 2 1 2 4 4 | 0.73 | 28.93 | 2 1 5 2 4 | 0.52 | 16.32 | 1 3 3 2 2 | 0.41 | 14.98 | 5 1 6 4 1 | 0.29 | 12.73 |
| 4 1 1 4 3 | 0.72 | 32.62 | 2 1 5 4 2 | 0.52 | 16.5 | 5 3 1 3 4 | 0.41 | 15.16 | 5 3 5 2 2 | 0.29 | 10.86 |
| 2 1 1 2 3 | 0.72 | 32.73 | 4 2 4 4 1 | 0.52 | 16.68 | 3 2 4 4 1 | 0.41 | 13.45 | 1 3 5 4 2 | 0.29 | 12.53 |
| 2 2 1 4 1 | 0.72 | 33.66 | 3 1 1 1 2 | 0.52 | 24.04 | 2 3 2 3 2 | 0.41 | 12.82 | 1 1 6 2 4 | 0.29 | 12.76 |
| 4 2 1 2 4 | 0.72 | 30.55 | 2 2 4 2 1 | 0.52 | 17.09 | 3 1 3 1 3 | 0.41 | 14.7 | 5 2 4 3 2 | 0.29 | 10.52 |
| 4 2 1 4 2 | 0.72 | 29.44 | 3 3 1 4 3 | 0.52 | 18.12 | 3 2 4 2 2 | 0.41 | 12.41 | 5 1 6 2 2 | 0.29 | 11.33 |
| 2 2 1 2 2 | 0.72 | 30.82 | 4 1 3 1 3 | 0.52 | 18.68 | 5 1 5 4 3 | 0.41 | 13.14 | 5 2 6 4 3 | 0.29 | 10.33 |
| 2 2 2 4 4 | 0.72 | 25.58 | 4 2 4 2 2 | 0.52 | 15.72 | 4 1 5 1 4 | 0.41 | 14.66 | 1 1 6 4 2 | 0.29 | 13.32 |
| 4 1 1 4 1 | 0.71 | 36.98 | 5 2 4 4 4 | 0.52 | 15.25 | 1 1 4 2 1 | 0.41 | 18.8 | 3 2 3 3 1 | 0.29 | 10.84 |
| 2 1 1 2 1 | 0.71 | 39.23 | 1 1 1 1 3 | 0.52 | 36.08 | 4 1 4 3 4 | 0.41 | 13.21 | 4 2 6 1 4 | 0.29 | 11.68 |
| 4 1 1 2 2 | 0.71 | 32.75 | 4 3 1 1 3 | 0.52 | 21.83 | 2 1 5 1 2 | 0.41 | 14.82 | 2 3 6 4 1 | 0.29 | 11.56 |
| 4 2 1 4 3 | 0.71 | 28.22 | 3 2 3 2 4 | 0.52 | 15.29 | 4 2 4 1 1 | 0.41 | 15.86 | 4 3 6 2 4 | 0.29 | 10.48 |
| 2 1 3 4 4 | 0.71 | 25.53 | 3 2 2 4 1 | 0.52 | 16.67 | 2 3 5 4 3 | 0.41 | 12.24 | 4 3 6 4 2 | 0.29 | 10.57 |
| 2 2 1 2 3 | 0.71 | 28.59 | 3 2 3 4 2 | 0.52 | 15.08 | 1 2 4 2 3 | 0.41 | 14.52 | 2 2 6 1 2 | 0.29 | 11.59 |
| 4 1 2 4 4 | 0.71 | 26.23 | 4 1 1 3 1 | 0.52 | 24.28 | 4 3 4 2 1 | 0.41 | 13.78 | 2 3 6 2 2 | 0.29 | 10.5 |
| 2 1 2 2 4 | 0.71 | 27.39 | 3 2 2 2 2 | 0.52 | 15.56 | 2 1 4 3 2 | 0.41 | 13.44 | 3 3 4 1 4 | 0.29 | 11.7 |
| 5 1 1 4 4 | 0.7 | 30.54 | 5 1 3 2 1 | 0.52 | 19.14 | 3 3 1 1 3 | 0.41 | 17.23 | 1 3 3 3 4 | 0.29 | 11.7 |
| 2 1 2 4 2 | 0.7 | 27.14 | 1 1 3 4 1 | 0.52 | 23.09 | 2 1 6 4 3 | 0.41 | 13.02 | 5 3 2 3 1 | 0.29 | 11.38 |
| 2 3 1 4 4 | 0.7 | 28.55 | 4 2 1 3 3 | 0.51 | 18.13 | 3 1 1 3 1 | 0.4 | 18.91 | 5 3 3 3 2 | 0.29 | 10.38 |
| 4 1 1 2 3 | 0.7 | 31.09 | 1 1 2 2 1 | 0.51 | 23.1 | 5 2 4 1 4 | 0.4 | 14.08 | 4 1 5 3 3 | 0.29 | 10.78 |
| 2 1 2 4 3 | 0.69 | 25.13 | 2 1 3 3 4 | 0.51 | 15.8 | 4 2 5 2 1 | 0.4 | 13.78 | 3 2 5 1 4 | 0.29 | 11.27 |
| 2 1 1 1 4 | 0.69 | 34.91 | 5 2 3 2 3 | 0.51 | 15.49 | 5 3 4 2 4 | 0.4 | 12.67 | 3 3 5 2 4 | 0.29 | 10.26 |
| 4 2 1 4 1 | 0.69 | 30.51 | 4 1 2 3 4 | 0.51 | 16.38 | 1 3 4 4 4 | 0.4 | 14.53 | 1 3 2 3 2 | 0.29 | 11.75 |
| 2 2 1 2 1 | 0.69 | 32.37 | 1 1 3 2 2 | 0.51 | 20.32 | 5 3 4 4 2 | 0.4 | 12.95 | 5 3 4 1 3 | 0.29 | 11.83 |
| 4 2 1 2 2 | 0.69 | 28.07 | 1 2 3 4 3 | 0.51 | 17.76 | 3 2 1 3 3 | 0.4 | 14.22 | 3 2 4 3 4 | 0.29 | 9.89 |
| 2 2 3 4 4 | 0.69 | 22.69 | 4 3 3 4 1 | 0.51 | 16.73 | 3 1 2 3 4 | 0.4 | 12.98 | 3 3 5 4 2 | 0.29 | 10.35 |
| 4 2 2 4 4 | 0.69 | 23.14 | 2 2 3 1 1 | 0.51 | 18.71 | 3 3 3 4 1 | 0.4 | 13.59 | 3 1 6 2 4 | 0.29 | 10.59 |
| 2 2 2 2 4 | 0.69 | 24.23 | 2 3 3 2 1 | 0.51 | 16.77 | 3 2 2 1 1 | 0.4 | 15.71 | 5 1 5 1 1 | 0.29 | 14.15 |
| 5 2 1 4 4 | 0.69 | 26.51 | 5 1 1 3 4 | 0.51 | 19.75 | 3 3 2 2 1 | 0.4 | 13.83 | 3 1 6 4 2 | 0.28 | 10.75 |
| 2 2 2 4 2 | 0.69 | 23.78 | 4 2 2 1 1 | 0.51 | 19.4 | 5 2 5 2 4 | 0.4 | 12.32 | 5 1 4 3 1 | 0.28 | 12.43 |
| 4 1 1 2 1 | 0.68 | 36.38 | 1 2 2 2 3 | 0.51 | 17.78 | 1 2 5 4 4 | 0.4 | 13.98 | 5 2 5 1 3 | 0.28 | 11.23 |
| 4 1 3 4 4 | 0.68 | 23.62 | 4 3 2 2 1 | 0.51 | 17.33 | 3 2 3 1 2 | 0.4 | 13.77 | 1 1 5 1 2 | 0.28 | 15.39 |
| 4 2 1 2 3 | 0.68 | 26.88 | 2 1 2 3 2 | 0.51 | 16.68 | 3 3 3 2 2 | 0.4 | 12.39 | 5 3 5 2 3 | 0.28 | 10.49 |
| 2 1 3 2 4 | 0.68 | 24.05 | 4 2 3 1 2 | 0.51 | 17.15 | 5 2 5 4 2 | 0.4 | 12.32 | 1 3 5 4 3 | 0.28 | 11.99 |
| 2 1 2 4 1 | 0.68 | 27.47 | 5 2 1 1 1 | 0.51 | 25.69 | 1 1 3 1 1 | 0.4 | 23.86 | 2 3 5 1 1 | 0.28 | 12.85 |
| 4 1 2 2 4 | 0.68 | 25.06 | 4 3 3 2 2 | 0.51 | 15.6 | 5 1 2 3 3 | 0.4 | 13.43 | 5 2 4 3 3 | 0.28 | 10.31 |
| 2 1 3 4 2 | 0.68 | 24.04 | 5 3 1 2 1 | 0.51 | 21.64 | 4 2 6 4 4 | 0.4 | 12.06 | 1 1 4 3 2 | 0.28 | 13.18 |
| 5 1 1 2 4 | 0.68 | 29.3 | 1 3 1 4 1 | 0.51 | 27.89 | 1 2 3 1 3 | 0.4 | 16.67 | 2 3 4 3 1 | 0.28 | 11 |
| 1 1 1 4 4 | 0.68 | 36.63 | 2 3 1 3 4 | 0.51 | 18.07 | 4 3 3 1 1 | 0.4 | 15.84 | 5 1 6 2 3 | 0.28 | 10.98 |
| 4 1 2 4 2 | 0.68 | 24.46 | 1 2 1 1 2 | 0.51 | 30.07 | 1 3 3 2 3 | 0.4 | 14.42 | 1 1 6 4 3 | 0.28 | 12.79 |
| 2 1 2 2 2 | 0.68 | 25.6 | 5 3 3 4 4 | 0.51 | 15.25 | 2 2 6 2 4 | 0.4 | 12.23 | 4 3 5 1 2 | 0.28 | 11.79 |
| 2 2 2 4 3 | 0.68 | 22.24 | 1 3 1 2 2 | 0.51 | 23.14 | 3 1 4 2 1 | 0.4 | 14.47 | 2 1 6 1 1 | 0.28 | 14.24 |
| 5 1 1 4 2 | 0.68 | 29.09 | 5 2 2 1 4 | 0.51 | 17.24 | 2 2 6 4 2 | 0.4 | 12.34 | 4 3 4 3 2 | 0.28 | 10.31 |
| 4 3 1 4 4 | 0.67 | 26.38 | 5 3 2 2 4 | 0.51 | 15.87 | 2 3 2 3 3 | 0.4 | 12.25 | 4 1 6 1 2 | 0.28 | 12.54 |
| 2 2 1 1 4 | 0.67 | 30.37 | 1 3 2 4 4 | 0.51 | 17.7 | 1 3 1 1 1 | 0.4 | 36.21 | 4 3 6 4 3 | 0.28 | 10.3 |
| 2 3 1 2 4 | 0.67 | 26.84 | 2 1 5 4 3 | 0.51 | 15.38 | 3 2 4 2 3 | 0.4 | 11.89 | 2 2 6 1 3 | 0.28 | 10.97 |
| 2 3 1 4 2 | 0.67 | 26.76 | 4 1 4 2 1 | 0.51 | 18.39 | 5 3 3 1 4 | 0.4 | 14.04 | 2 3 6 2 3 | 0.28 | 9.99 |
| 3 1 1 4 4 | 0.67 | 27.35 | 5 3 2 4 2 | 0.51 | 15.79 | 4 2 3 3 1 | 0.4 | 13.03 | 2 2 5 3 1 | 0.28 | 10.92 |
| 2 1 3 4 3 | 0.67 | 22.5 | 3 1 1 1 3 | 0.51 | 22.44 | 1 3 2 1 4 | 0.39 | 16.92 | 4 2 5 3 2 | 0.28 | 10.01 |
| 4 1 2 4 3 | 0.66 | 23.27 | 4 2 4 2 3 | 0.51 | 15.06 | 2 1 5 1 3 | 0.39 | 13.7 | 3 3 3 3 4 | 0.28 | 9.92 |
| 2 1 2 2 3 | 0.66 | 23.63 | 5 1 4 2 4 | 0.51 | 16.25 | 5 3 2 1 2 | 0.39 | 14.45 | 3 3 2 3 2 | 0.28 | 10.04 |
| 5 1 1 4 3 | 0.66 | 27.71 | 1 1 4 4 4 | 0.51 | 18.98 | 1 2 1 3 1 | 0.39 | 21.54 | 5 2 6 4 1 | 0.28 | 11.1 |
| 4 1 1 1 4 | 0.66 | 33.57 | 5 1 4 4 2 | 0.51 | 16.59 | 2 1 4 3 3 | 0.39 | 12.73 | 1 2 6 2 4 | 0.28 | 11.4 |
| 2 1 1 1 2 | 0.66 | 32.99 | 4 3 4 4 4 | 0.51 | 14.95 | 3 3 4 4 4 | 0.39 | 12.1 | 5 3 3 3 3 | 0.28 | 10.27 |
| 2 3 1 4 3 | 0.66 | 24.86 | 3 1 3 4 1 | 0.51 | 17.77 | 5 2 3 3 4 | 0.39 | 11.92 | 5 2 6 2 2 | 0.28 | 10.19 |
| 4 2 1 2 1 | 0.66 | 29.7 | 2 2 4 1 4 | 0.51 | 16.64 | 1 2 2 3 4 | 0.39 | 13.73 | 1 2 6 4 2 | 0.28 | 11.66 |
| 4 2 3 4 4 | 0.66 | 20.92 | 2 3 4 2 4 | 0.51 | 14.95 | 1 1 4 1 4 | 0.39 | 18.63 | 1 3 2 3 3 | 0.28 | 11.49 |
| 2 2 3 2 4 | 0.66 | 21.42 | 3 1 2 2 1 | 0.5 | 18.38 | 3 2 5 4 4 | 0.39 | 11.7 | 3 1 5 1 2 | 0.28 | 11.86 |
| 2 2 2 4 1 | 0.66 | 23.6 | 2 3 4 4 2 | 0.5 | 15.24 | 5 2 2 3 2 | 0.39 | 12.21 | 3 3 5 4 3 | 0.28 | 9.97 |
| 4 2 2 2 4 | 0.66 | 22.1 | 3 1 3 2 2 | 0.5 | 15.99 | 5 1 4 1 2 | 0.39 | 15.36 | 3 1 4 3 2 | 0.28 | 10.47 |
| 2 2 3 4 2 | 0.66 | 21.2 | 3 2 3 4 3 | 0.5 | 14.54 | 5 3 4 4 3 | 0.39 | 12.45 | 3 1 6 4 3 | 0.27 | 10.39 |
| 5 2 1 2 4 | 0.66 | 25.41 | 3 2 2 2 3 | 0.5 | 14.87 | 4 3 4 1 4 | 0.39 | 14.04 | 1 1 5 1 3 | 0.27 | 14.39 |
| 1 2 1 4 4 | 0.66 | 30.5 | 4 2 5 4 4 | 0.5 | 14.32 | 3 1 3 1 1 | 0.39 | 17 | 1 1 4 3 3 | 0.27 | 12.75 |
| 4 2 2 4 2 | 0.66 | 21.42 | 2 2 5 2 4 | 0.5 | 14.82 | 5 1 5 4 1 | 0.39 | 14.48 | 4 3 5 1 3 | 0.27 | 11.33 |
| 2 2 2 2 2 | 0.66 | 22.46 | 3 3 1 4 1 | 0.5 | 20.46 | 2 3 4 1 2 | 0.39 | 13.85 | 4 3 4 3 3 | 0.27 | 10.11 |
| 5 2 1 4 2 | 0.66 | 24.9 | 2 2 5 4 2 | 0.5 | 14.81 | 1 1 5 2 4 | 0.39 | 15.15 | 4 1 6 1 3 | 0.27 | 12.09 |
| 2 1 1 1 3 | 0.65 | 29.7 | 4 1 3 1 1 | 0.5 | 21.16 | 3 2 3 1 3 | 0.39 | 13.26 | 4 1 5 3 1 | 0.27 | 11.72 |
| 3 2 1 4 4 | 0.65 | 23.94 | 1 1 3 2 3 | 0.5 | 19.33 | 3 3 3 2 3 | 0.39 | 11.96 | 5 3 4 1 1 | 0.27 | 13.08 |
| 2 1 3 4 1 | 0.65 | 24.49 | 3 2 1 1 2 | 0.5 | 20.64 | 5 1 5 2 2 | 0.39 | 13.28 | 4 2 5 3 3 | 0.27 | 9.83 |
| 4 1 3 2 4 | 0.65 | 22.49 | 3 3 1 2 2 | 0.5 | 17.76 | 5 2 5 4 3 | 0.39 | 11.89 | 1 3 4 1 2 | 0.27 | 14.09 |
| 4 1 2 4 1 | 0.65 | 24.85 | 2 1 2 3 3 | 0.5 | 15.77 | 1 1 5 4 2 | 0.39 | 15.63 | 5 1 5 3 4 | 0.27 | 10.35 |
| 2 1 2 2 1 | 0.65 | 26.28 | 4 2 3 1 3 | 0.5 | 16.56 | 4 2 5 1 4 | 0.39 | 13.33 | 3 2 6 2 4 | 0.27 | 9.71 |
| 4 1 3 4 2 | 0.65 | 22.16 | 3 3 2 4 4 | 0.5 | 15.09 | 2 3 5 4 1 | 0.39 | 13.38 | 5 2 5 1 1 | 0.27 | 12.46 |
| 5 1 1 4 1 | 0.65 | 31.93 | 1 1 1 1 1 | 0.5 | . | 1 2 4 2 1 | 0.39 | 15.82 | 5 3 5 2 1 | 0.27 | 11.4 |
| 2 1 3 2 2 | 0.65 | 22.58 | 4 3 3 2 3 | 0.5 | 15.07 | 4 3 5 2 4 | 0.39 | 12.26 | 1 3 5 4 1 | 0.27 | 13.2 |
| 2 2 3 4 3 | 0.65 | 20 | 5 1 3 1 4 | 0.5 | 17.8 | 3 3 1 1 1 | 0.39 | 21.41 | 3 2 6 4 2 | 0.27 | 9.75 |
| 1 1 1 2 4 | 0.65 | 35.42 | 1 2 1 1 3 | 0.5 | 28 | 4 2 4 3 4 | 0.39 | 11.89 | 3 3 2 3 3 | 0.27 | 9.82 |
| 4 1 2 2 2 | 0.65 | 23.29 | 4 3 1 1 1 | 0.5 | 26.33 | 4 3 5 4 2 | 0.39 | 12.25 | 5 2 4 3 1 | 0.27 | 10.9 |
| 4 2 2 4 3 | 0.65 | 20.51 | 1 3 1 2 3 | 0.5 | 21.9 | 2 2 5 1 2 | 0.39 | 13.43 | 2 3 5 3 4 | 0.27 | 9.85 |
| 2 2 2 2 3 | 0.65 | 20.95 | 1 1 2 1 4 | 0.5 | 22.38 | 2 1 6 4 1 | 0.39 | 14.68 | 5 1 6 2 1 | 0.27 | 12.24 |
| 5 1 1 2 2 | 0.65 | 27.77 | 5 1 2 1 2 | 0.5 | 18.53 | 4 1 6 2 4 | 0.39 | 12.91 | 1 2 5 1 2 | 0.27 | 13.57 |
| 5 2 1 4 3 | 0.65 | 23.92 | 5 3 2 4 3 | 0.5 | 15.17 | 2 3 5 2 2 | 0.39 | 12.43 | 1 1 6 4 1 | 0.27 | 14.61 |
| 1 1 1 4 2 | 0.65 | 35.92 | 2 3 3 1 4 | 0.5 | 16.34 | 2 2 4 3 2 | 0.39 | 12.04 | 1 3 5 2 2 | 0.27 | 11.96 |
| 4 2 1 1 4 | 0.64 | 28.78 | 3 1 4 4 4 | 0.5 | 15.23 | 4 1 6 4 2 | 0.39 | 12.99 | 1 2 4 3 2 | 0.27 | 11.56 |
| 2 3 1 4 1 | 0.64 | 27.88 | 4 3 2 1 4 | 0.5 | 17.4 | 2 1 6 2 2 | 0.39 | 13.1 | 2 1 6 3 4 | 0.27 | 10.38 |
| 4 3 1 2 4 | 0.64 | 25.09 | 5 3 1 1 4 | 0.5 | 21.1 | 2 2 6 4 3 | 0.39 | 11.73 | 5 2 6 2 3 | 0.27 | 9.94 |
| 5 1 2 4 4 | 0.64 | 22.1 | 4 2 1 3 1 | 0.5 | 19.75 | 3 3 2 1 4 | 0.39 | 14.12 | 1 1 6 2 2 | 0.27 | 12.52 |
| 4 3 1 4 2 | 0.64 | 24.55 | 2 3 2 1 2 | 0.5 | 17.17 | 3 2 1 3 1 | 0.38 | 15.78 | 1 2 6 4 3 | 0.27 | 11.32 |
| 2 2 1 1 2 | 0.64 | 28.25 | 5 2 3 2 1 | 0.49 | 16.46 | 5 3 2 1 3 | 0.38 | 13.84 | 4 3 6 4 1 | 0.27 | 11.07 |
| 2 3 1 2 2 | 0.64 | 25 | 1 2 3 4 1 | 0.49 | 19.07 | 3 2 2 3 4 | 0.38 | 11.72 | 2 2 6 1 1 | 0.27 | 12.42 |
| 2 3 2 4 4 | 0.64 | 20.99 | 1 2 2 2 1 | 0.49 | 19.18 | 3 1 4 1 4 | 0.38 | 14.27 | 2 3 6 2 1 | 0.27 | 10.98 |
| 2 1 4 4 4 | 0.64 | 21.2 | 2 2 3 3 4 | 0.49 | 14.16 | 1 1 3 3 4 | 0.38 | 14.82 | 3 1 5 1 3 | 0.27 | 11.28 |
| 3 1 1 2 4 | 0.64 | 25.96 | 5 1 4 4 3 | 0.49 | 15.81 | 5 1 2 3 1 | 0.38 | 14.46 | 4 2 6 1 2 | 0.27 | 11.2 |
| 3 1 1 4 2 | 0.64 | 25.6 | 4 2 2 3 4 | 0.49 | 14.55 | 5 1 3 3 2 | 0.38 | 12.83 | 3 1 4 3 3 | 0.27 | 10.17 |
| 4 1 3 4 3 | 0.63 | 21.26 | 1 2 3 2 2 | 0.49 | 17.51 | 1 2 3 1 1 | 0.38 | 18.96 | 4 3 6 2 2 | 0.27 | 10.1 |
| 2 1 3 2 3 | 0.63 | 21.09 | 4 1 4 1 4 | 0.49 | 17.82 | 1 3 3 2 1 | 0.38 | 15.63 | 5 3 6 4 4 | 0.26 | 10.03 |
| 4 1 2 2 3 | 0.63 | 22.11 | 5 2 1 3 4 | 0.49 | 17.11 | 3 1 5 2 4 | 0.38 | 12.34 | 5 3 3 3 1 | 0.26 | 10.8 |
| 5 1 1 2 3 | 0.63 | 26.38 | 2 2 2 3 2 | 0.49 | 14.75 | 4 3 3 3 4 | 0.38 | 11.85 | 3 3 4 1 2 | 0.26 | 11.22 |
| 1 1 1 4 3 | 0.63 | 33.55 | 2 1 4 1 2 | 0.49 | 17.84 | 5 2 2 3 3 | 0.38 | 11.96 | 1 3 2 3 1 | 0.26 | 12.11 |
| 2 1 1 1 1 | 0.63 | 39.4 | 2 3 4 4 3 | 0.49 | 14.29 | 1 1 2 3 2 | 0.38 | 15.05 | 1 3 3 3 2 | 0.26 | 11.31 |
| 4 1 1 1 2 | 0.63 | 31.34 | 3 1 3 2 3 | 0.49 | 15.3 | 5 1 4 1 3 | 0.38 | 14.56 | 3 3 5 4 1 | 0.26 | 10.87 |
| 4 3 1 4 3 | 0.63 | 23.54 | 2 1 5 4 1 | 0.49 | 17.15 | 2 3 2 3 1 | 0.38 | 13.07 | 1 3 4 1 3 | 0.26 | 13.29 |
| 2 2 1 1 3 | 0.63 | 25.93 | 4 1 5 2 4 | 0.49 | 15.36 | 3 1 5 4 2 | 0.38 | 12.42 | 3 2 5 1 2 | 0.26 | 10.87 |
| 2 3 1 2 3 | 0.63 | 23.17 | 3 1 1 1 1 | 0.49 | 30.82 | 2 3 3 3 2 | 0.38 | 11.74 | 3 1 6 4 1 | 0.26 | 11.58 |
| 2 1 2 1 4 | 0.63 | 24.36 | 4 1 5 4 2 | 0.49 | 15.3 | 3 2 4 2 1 | 0.38 | 12.81 | 3 3 5 2 2 | 0.26 | 9.94 |
| 2 2 3 4 1 | 0.63 | 21.19 | 2 1 5 2 2 | 0.49 | 15.79 | 1 3 1 3 4 | 0.38 | 17.6 | 3 2 4 3 2 | 0.26 | 9.53 |
| 4 2 3 2 4 | 0.63 | 19.93 | 2 2 5 4 3 | 0.49 | 13.94 | 4 3 2 3 2 | 0.38 | 12.07 | 1 1 5 1 1 | 0.26 | 17.7 |
| 4 2 2 4 1 | 0.63 | 21.33 | 4 2 4 2 1 | 0.49 | 15.98 | 5 3 1 3 2 | 0.38 | 14.49 | 3 1 6 2 2 | 0.26 | 10.23 |
| 2 2 2 2 1 | 0.63 | 22.54 | 3 2 1 1 3 | 0.49 | 19.58 | 2 3 4 1 3 | 0.38 | 12.88 | 3 2 6 4 3 | 0.26 | 9.48 |
| 4 2 3 4 2 | 0.63 | 19.48 | 3 3 1 2 3 | 0.49 | 16.94 | 5 1 5 2 3 | 0.38 | 12.71 | 1 1 4 3 1 | 0.26 | 14.1 |
| 5 2 1 4 1 | 0.63 | 26.13 | 3 1 2 1 4 | 0.49 | 17.83 | 1 1 5 4 3 | 0.38 | 14.79 | 1 2 5 1 3 | 0.26 | 12.89 |
| 2 2 3 2 2 | 0.63 | 19.96 | 5 2 4 2 4 | 0.49 | 14.56 | 2 1 5 1 1 | 0.38 | 16.04 | 4 3 5 1 1 | 0.26 | 12.62 |
| 1 2 1 2 4 | 0.63 | 29.39 | 1 2 4 4 4 | 0.49 | 16.65 | 2 1 4 3 1 | 0.38 | 14 | 1 3 5 2 3 | 0.26 | 11.44 |
| 4 2 2 2 2 | 0.63 | 20.4 | 5 2 4 4 2 | 0.49 | 14.66 | 4 1 5 1 2 | 0.37 | 14.22 | 1 2 4 3 3 | 0.26 | 11.29 |
| 5 2 1 2 2 | 0.63 | 23.76 | 5 1 2 1 3 | 0.48 | 17.58 | 4 3 5 4 3 | 0.37 | 11.81 | 4 3 4 3 1 | 0.26 | 10.64 |
| 1 2 1 4 2 | 0.63 | 29.05 | 3 2 3 4 1 | 0.48 | 15.48 | 2 2 5 1 3 | 0.37 | 12.56 | 4 1 6 1 1 | 0.26 | 13.99 |
| 5 2 2 4 4 | 0.63 | 19.52 | 3 2 2 2 1 | 0.48 | 15.98 | 2 3 5 2 3 | 0.37 | 11.69 | 1 1 6 2 3 | 0.26 | 12.03 |
| 3 1 1 4 3 | 0.62 | 24.22 | 3 2 3 2 2 | 0.48 | 14.29 | 4 1 4 3 2 | 0.37 | 12.75 | 4 2 6 1 3 | 0.26 | 10.9 |
| 4 1 1 1 3 | 0.62 | 29.56 | 2 3 2 1 3 | 0.48 | 15.92 | 2 2 4 3 3 | 0.37 | 11.51 | 5 3 5 1 4 | 0.26 | 11.09 |
| 2 2 4 4 4 | 0.62 | 18.95 | 1 1 3 2 1 | 0.48 | 22.08 | 4 1 6 4 3 | 0.37 | 12.56 | 4 3 6 2 3 | 0.26 | 9.84 |
| 3 2 1 2 4 | 0.62 | 22.77 | 4 1 3 3 4 | 0.48 | 15.03 | 2 1 6 2 3 | 0.37 | 12.33 | 4 2 5 3 1 | 0.25 | 10.44 |
| 4 1 3 4 1 | 0.62 | 22.76 | 2 1 2 3 1 | 0.48 | 17.27 | 5 3 4 4 1 | 0.37 | 13.28 | 5 3 4 3 4 | 0.25 | 9.91 |
| 2 1 3 2 1 | 0.62 | 23.29 | 4 2 3 1 1 | 0.48 | 18.01 | 1 2 4 1 4 | 0.37 | 16.25 | 5 1 6 1 4 | 0.25 | 11.69 |
| 3 2 1 4 2 | 0.62 | 22.19 | 1 2 3 2 3 | 0.48 | 16.83 | 1 3 4 2 4 | 0.37 | 13.65 | 2 3 6 1 4 | 0.25 | 10.95 |
| 4 1 2 2 1 | 0.62 | 24.03 | 4 3 3 2 1 | 0.48 | 15.97 | 5 2 4 1 2 | 0.37 | 13.61 | 3 3 2 3 1 | 0.25 | 10.42 |
| 4 1 3 2 2 | 0.62 | 21.03 | 2 1 3 3 2 | 0.48 | 15.06 | 3 1 3 3 4 | 0.37 | 12.06 | 5 2 5 3 4 | 0.25 | 9.49 |
| 5 1 1 2 1 | 0.62 | 31.3 | 1 1 1 3 4 | 0.48 | 24.34 | 5 3 4 2 2 | 0.37 | 12.25 | 3 3 3 3 2 | 0.25 | 9.49 |
| 4 2 3 4 3 | 0.62 | 18.8 | 4 1 2 3 2 | 0.48 | 15.45 | 1 3 4 4 2 | 0.37 | 14.22 | 3 3 4 1 3 | 0.25 | 10.72 |
| 1 1 1 4 1 | 0.62 | 45 | 2 2 2 3 3 | 0.48 | 14.07 | 3 2 3 1 1 | 0.37 | 14.72 | 5 2 6 2 1 | 0.25 | 10.74 |
| 2 2 3 2 3 | 0.61 | 18.8 | 5 1 1 3 2 | 0.48 | 18.95 | 3 3 3 2 1 | 0.37 | 12.89 | 1 2 6 4 1 | 0.25 | 12.35 |
| 4 2 2 2 3 | 0.61 | 19.51 | 1 2 1 1 1 | 0.48 | 41.96 | 5 2 5 4 1 | 0.37 | 12.74 | 3 1 5 1 1 | 0.25 | 13.12 |
| 2 1 1 3 4 | 0.61 | 24.46 | 2 1 4 1 3 | 0.48 | 16.36 | 3 1 2 3 2 | 0.37 | 12.31 | 1 3 3 3 3 | 0.25 | 11.15 |
| 5 1 3 4 4 | 0.61 | 20.05 | 1 3 1 2 1 | 0.48 | 26.17 | 1 2 5 2 4 | 0.37 | 13.58 | 2 2 6 3 4 | 0.25 | 9.47 |
| 5 2 1 2 3 | 0.61 | 22.78 | 4 3 1 3 4 | 0.48 | 17.18 | 5 2 5 2 2 | 0.37 | 11.96 | 3 1 4 3 1 | 0.25 | 11.08 |
| 1 1 1 2 2 | 0.61 | 34.26 | 5 2 3 1 4 | 0.48 | 15.84 | 1 2 5 4 2 | 0.37 | 13.75 | 1 2 6 2 2 | 0.25 | 11.08 |
| 1 2 1 4 3 | 0.61 | 27.62 | 5 3 3 2 4 | 0.48 | 14.52 | 3 3 1 3 4 | 0.37 | 13.81 | 3 2 5 1 3 | 0.25 | 10.43 |
| 4 3 1 4 1 | 0.61 | 25.79 | 1 3 3 4 4 | 0.48 | 16.61 | 5 1 3 3 3 | 0.37 | 12.62 | 3 3 5 2 3 | 0.25 | 9.57 |
| 2 2 1 1 1 | 0.61 | 31.38 | 5 3 2 4 1 | 0.48 | 16.03 | 1 1 2 3 3 | 0.37 | 14.58 | 3 2 4 3 3 | 0.25 | 9.32 |
| 2 3 1 2 1 | 0.61 | 26.38 | 2 3 1 3 2 | 0.48 | 17.07 | 2 2 6 4 1 | 0.37 | 12.8 | 3 1 6 2 3 | 0.25 | 9.88 |
| 5 1 2 2 4 | 0.61 | 21.15 | 1 2 2 1 4 | 0.48 | 19.32 | 4 2 6 2 4 | 0.37 | 11.63 | 1 3 4 1 1 | 0.24 | 15.09 |
| 1 1 2 4 4 | 0.61 | 23.87 | 5 3 3 4 2 | 0.48 | 14.57 | 3 1 5 4 3 | 0.37 | 11.87 | 3 2 6 4 1 | 0.24 | 10.28 |
| 4 2 1 1 2 | 0.61 | 26.49 | 1 3 2 2 4 | 0.48 | 16.77 | 2 3 3 3 3 | 0.37 | 11.32 | 1 1 5 3 4 | 0.24 | 11.58 |
| 4 3 1 2 2 | 0.61 | 23.2 | 4 1 5 4 3 | 0.48 | 14.64 | 4 2 6 4 2 | 0.37 | 11.58 | 3 3 3 3 3 | 0.24 | 9.35 |
| 5 1 2 4 2 | 0.61 | 20.96 | 5 2 2 1 2 | 0.48 | 16.25 | 4 3 2 3 3 | 0.37 | 11.82 | 5 1 5 3 2 | 0.24 | 10.25 |
| 2 3 3 4 4 | 0.61 | 18.71 | 2 1 5 2 3 | 0.48 | 14.69 | 2 2 6 2 2 | 0.37 | 11.76 | 1 2 5 1 1 | 0.24 | 14.84 |
| 4 3 2 4 4 | 0.61 | 19.29 | 5 3 2 2 2 | 0.48 | 15.01 | 5 3 1 3 3 | 0.37 | 14.27 | 1 3 5 2 1 | 0.24 | 12.64 |
| 2 2 2 1 4 | 0.61 | 21.61 | 1 3 2 4 2 | 0.48 | 16.88 | 1 3 3 1 4 | 0.36 | 16.07 | 3 2 6 2 2 | 0.24 | 9.34 |
| 2 3 2 2 4 | 0.61 | 19.79 | 3 2 4 4 4 | 0.48 | 13.76 | 5 3 2 1 1 | 0.36 | 15.2 | 1 2 4 3 1 | 0.24 | 12.03 |
| 5 3 1 4 4 | 0.61 | 22.41 | 5 1 4 4 1 | 0.47 | 17.26 | 5 3 3 1 2 | 0.36 | 13.44 | 4 3 5 3 4 | 0.24 | 9.55 |
| 2 3 2 4 2 | 0.61 | 19.68 | 1 1 4 2 4 | 0.47 | 17.92 | 4 1 5 1 3 | 0.36 | 13.55 | 1 1 6 2 1 | 0.24 | 13.72 |
| 4 1 4 4 4 | 0.61 | 19.64 | 5 1 4 2 2 | 0.47 | 15.72 | 4 1 4 3 3 | 0.36 | 12.4 | 4 1 6 3 4 | 0.24 | 10.06 |
| 2 1 4 2 4 | 0.61 | 19.92 | 5 2 4 4 3 | 0.47 | 14.09 | 1 3 2 1 2 | 0.36 | 16.05 | 2 3 5 3 2 | 0.24 | 9.66 |
| 2 1 4 4 2 | 0.61 | 20.3 | 1 1 4 4 2 | 0.47 | 18.74 | 3 2 4 1 4 | 0.36 | 12.96 | 4 2 6 1 1 | 0.24 | 12.09 |
| 3 1 1 4 1 | 0.61 | 28.51 | 4 2 4 1 4 | 0.47 | 15.92 | 3 3 4 2 4 | 0.36 | 11.45 | 1 2 6 2 3 | 0.24 | 10.75 |
| 3 1 1 2 2 | 0.6 | 24.12 | 2 3 4 4 1 | 0.47 | 15.37 | 3 3 4 4 2 | 0.36 | 11.62 | 4 3 6 2 1 | 0.24 | 10.62 |
| 3 2 1 4 3 | 0.6 | 21.19 | 4 3 4 2 4 | 0.47 | 14.18 | 1 2 3 3 4 | 0.36 | 13.05 | 2 1 6 3 2 | 0.24 | 10.17 |
| 3 1 2 4 4 | 0.6 | 19.74 | 3 1 3 2 1 | 0.47 | 16.93 | 5 2 2 3 1 | 0.36 | 12.53 | 5 2 6 1 4 | 0.24 | 10.59 |
| 4 1 3 2 3 | 0.6 | 20.16 | 4 3 4 4 2 | 0.47 | 14.27 | 5 1 4 1 1 | 0.36 | 16.75 | 5 3 6 2 4 | 0.24 | 9.64 |
| 4 1 1 1 1 | 0.6 | 38.91 | 2 2 4 1 2 | 0.47 | 15.89 | 5 2 3 3 2 | 0.36 | 11.42 | 1 3 6 4 4 | 0.24 | 10.94 |
| 1 1 1 2 3 | 0.6 | 31.81 | 2 3 4 2 2 | 0.47 | 14.27 | 3 2 5 2 4 | 0.36 | 11.34 | 5 3 6 4 2 | 0.24 | 9.85 |
| 4 2 1 1 3 | 0.6 | 25.3 | 3 2 3 2 3 | 0.47 | 13.77 | 1 2 2 3 2 | 0.36 | 13.1 | 3 3 4 1 1 | 0.24 | 11.95 |
| 4 3 1 2 3 | 0.6 | 22.21 | 3 1 1 3 4 | 0.47 | 17.68 | 5 2 4 1 3 | 0.36 | 13.04 | 1 3 3 3 1 | 0.24 | 11.8 |
| 5 1 2 4 3 | 0.6 | 19.97 | 2 2 5 4 1 | 0.47 | 15.12 | 1 1 4 1 2 | 0.36 | 18.46 | 3 1 5 3 4 | 0.24 | 9.58 |
| 2 1 3 1 4 | 0.6 | 21.51 | 4 2 5 2 4 | 0.47 | 13.9 | 5 3 4 2 3 | 0.36 | 11.78 | 3 2 5 1 1 | 0.24 | 11.73 |
| 4 1 2 1 4 | 0.6 | 22.88 | 3 2 1 1 1 | 0.47 | 24.08 | 1 3 4 4 3 | 0.36 | 13.54 | 3 3 5 2 1 | 0.24 | 10.48 |
| 5 1 1 1 4 | 0.6 | 27.95 | 3 3 1 2 1 | 0.47 | 19.29 | 3 2 5 4 2 | 0.36 | 11.29 | 3 2 4 3 1 | 0.23 | 9.91 |
| 2 1 2 1 2 | 0.6 | 22.92 | 4 2 5 4 2 | 0.47 | 13.72 | 2 3 4 1 1 | 0.36 | 14.42 | 3 1 6 2 1 | 0.23 | 11.04 |
| 2 3 2 4 3 | 0.6 | 18.4 | 2 2 5 2 2 | 0.47 | 14.22 | 5 1 5 2 1 | 0.36 | 14.17 | 5 1 5 3 3 | 0.23 | 10.04 |
| 2 3 1 1 4 | 0.6 | 25.45 | 2 1 3 3 3 | 0.47 | 14.38 | 1 1 5 4 1 | 0.36 | 16.95 | 3 2 6 2 3 | 0.23 | 9.08 |
| 4 2 3 4 1 | 0.6 | 19.59 | 3 3 3 4 4 | 0.47 | 13.88 | 4 3 4 1 2 | 0.36 | 13.43 | 2 3 5 3 3 | 0.23 | 9.29 |
| 2 2 3 2 1 | 0.6 | 20.15 | 4 1 2 3 3 | 0.47 | 15.02 | 3 1 2 3 3 | 0.36 | 11.95 | 2 1 6 3 3 | 0.23 | 9.79 |
| 4 2 2 2 1 | 0.6 | 20.56 | 3 2 2 1 4 | 0.47 | 15.94 | 2 1 5 3 4 | 0.36 | 11.79 | 3 3 6 4 4 | 0.23 | 9.36 |
| 4 2 3 2 2 | 0.6 | 18.51 | 3 3 2 2 4 | 0.47 | 14.32 | 5 2 5 2 3 | 0.36 | 11.54 | 1 3 5 1 4 | 0.23 | 12.72 |
| 5 2 1 2 1 | 0.6 | 25.4 | 5 1 1 3 3 | 0.47 | 18.54 | 1 1 5 2 2 | 0.36 | 15.01 | 1 3 4 3 4 | 0.23 | 10.75 |
| 1 2 1 4 1 | 0.6 | 32.28 | 3 3 2 4 2 | 0.47 | 14.19 | 1 2 5 4 3 | 0.36 | 13.17 | 5 3 5 1 2 | 0.23 | 10.91 |
| 2 1 4 4 3 | 0.59 | 18.82 | 1 1 3 1 4 | 0.47 | 21.15 | 4 3 5 4 1 | 0.36 | 12.67 | 1 1 6 1 4 | 0.23 | 13.54 |
| 2 2 1 3 4 | 0.59 | 21.28 | 5 1 2 1 1 | 0.46 | 20.01 | 2 2 5 1 1 | 0.36 | 14.18 | 5 3 4 3 2 | 0.23 | 9.7 |
| 5 2 3 4 4 | 0.59 | 17.78 | 2 3 1 3 3 | 0.46 | 16.22 | 2 3 5 2 1 | 0.36 | 12.88 | 5 1 6 1 2 | 0.23 | 11.48 |
| 1 2 1 2 2 | 0.59 | 27.7 | 5 1 3 1 2 | 0.46 | 17.06 | 2 2 4 3 1 | 0.36 | 12.31 | 5 3 6 4 3 | 0.23 | 9.62 |
| 5 2 2 2 4 | 0.59 | 18.69 | 5 3 3 4 3 | 0.46 | 14.11 | 4 2 5 1 2 | 0.36 | 12.82 | 3 3 3 3 1 | 0.23 | 9.92 |
| 1 2 2 4 4 | 0.59 | 20.75 | 4 3 3 1 4 | 0.46 | 15.93 | 4 1 6 4 1 | 0.36 | 13.85 | 4 3 6 1 4 | 0.23 | 10.83 |
| 5 2 2 4 2 | 0.59 | 18.35 | 5 2 2 1 3 | 0.46 | 15.57 | 4 3 5 2 2 | 0.36 | 11.82 | 1 2 5 3 4 | 0.23 | 10.48 |
| 3 1 1 2 3 | 0.59 | 22.77 | 1 1 2 1 2 | 0.46 | 21.42 | 2 1 6 2 1 | 0.36 | 13.99 | 2 3 6 1 2 | 0.23 | 10.63 |
| 4 2 4 4 4 | 0.59 | 17.51 | 5 3 2 2 3 | 0.46 | 14.4 | 4 2 4 3 2 | 0.35 | 11.4 | 5 2 5 3 2 | 0.23 | 9.33 |
| 2 2 4 2 4 | 0.59 | 17.87 | 1 3 2 4 3 | 0.46 | 16.1 | 3 3 3 1 4 | 0.35 | 13.06 | 1 2 6 2 1 | 0.23 | 11.76 |
| 2 2 4 4 2 | 0.59 | 17.98 | 3 1 4 2 4 | 0.46 | 14.4 | 4 1 6 2 2 | 0.35 | 12.42 | 4 2 6 3 4 | 0.23 | 9.14 |
| 2 1 2 1 3 | 0.59 | 20.99 | 2 3 2 1 1 | 0.46 | 17.78 | 4 2 6 4 3 | 0.35 | 11.28 | 2 2 6 3 2 | 0.23 | 9.22 |
| 3 2 1 4 1 | 0.59 | 23.64 | 2 3 3 1 2 | 0.46 | 15.46 | 5 3 5 4 4 | 0.35 | 11.45 | 3 3 5 1 4 | 0.22 | 10.5 |
| 4 1 3 2 1 | 0.58 | 21.91 | 3 1 4 4 2 | 0.46 | 14.61 | 2 2 6 2 3 | 0.35 | 11.18 | 3 3 4 3 4 | 0.22 | 9.09 |
| 3 2 1 2 2 | 0.58 | 20.97 | 1 3 1 1 4 | 0.46 | 27.85 | 3 3 2 1 2 | 0.35 | 13.22 | 3 1 6 1 4 | 0.22 | 10.91 |
| 3 2 2 4 4 | 0.58 | 17.6 | 4 3 2 1 2 | 0.46 | 16.24 | 5 1 6 4 4 | 0.35 | 12.05 | 5 3 5 1 3 | 0.22 | 10.51 |
| 4 2 3 2 3 | 0.58 | 17.85 | 5 3 1 1 2 | 0.46 | 19.97 | 5 3 3 1 3 | 0.35 | 13.01 | 3 2 5 3 4 | 0.22 | 8.88 |
| 1 1 1 2 1 | 0.58 | 44.96 | 1 2 3 2 1 | 0.46 | 18.28 | 3 2 3 3 4 | 0.35 | 10.94 | 5 3 4 3 3 | 0.22 | 9.52 |
| 4 1 1 3 4 | 0.58 | 22.95 | 4 2 3 3 4 | 0.46 | 13.42 | 2 3 6 4 4 | 0.35 | 11.4 | 5 1 6 1 3 | 0.22 | 11.09 |
| 5 1 3 2 4 | 0.58 | 19.12 | 5 1 4 2 3 | 0.46 | 14.97 | 1 3 2 1 3 | 0.35 | 15.18 | 5 1 5 3 1 | 0.22 | 10.95 |
| 4 2 1 1 1 | 0.58 | 29.99 | 2 2 2 3 1 | 0.46 | 14.95 | 3 2 2 3 2 | 0.35 | 11.07 | 3 2 6 2 1 | 0.22 | 9.88 |
| 1 1 3 4 4 | 0.58 | 22.24 | 1 1 4 4 3 | 0.46 | 17.62 | 5 1 3 3 1 | 0.35 | 13.59 | 2 3 6 1 3 | 0.22 | 10.07 |
| 1 2 1 2 3 | 0.58 | 26.24 | 2 1 4 1 1 | 0.46 | 19.02 | 3 1 4 1 2 | 0.35 | 13.7 | 5 2 5 3 3 | 0.22 | 9.18 |
| 4 3 1 2 1 | 0.58 | 24.75 | 2 2 3 3 2 | 0.46 | 13.41 | 3 3 4 4 3 | 0.35 | 11.15 | 1 1 5 3 2 | 0.22 | 11.54 |
| 5 1 2 4 1 | 0.58 | 21.54 | 1 2 1 3 4 | 0.46 | 20.04 | 1 1 2 3 1 | 0.35 | 15.95 | 2 3 5 3 1 | 0.22 | 10.06 |
| 2 1 1 3 2 | 0.58 | 23.21 | 4 2 2 3 2 | 0.46 | 13.65 | 5 2 3 3 3 | 0.35 | 11.28 | 4 3 5 3 2 | 0.22 | 9.33 |
| 5 1 3 4 2 | 0.58 | 19.12 | 4 1 4 1 2 | 0.46 | 17.08 | 1 1 3 3 2 | 0.35 | 14.38 | 2 1 6 3 1 | 0.22 | 10.88 |
| 1 1 2 2 4 | 0.58 | 22.82 | 4 3 4 4 3 | 0.46 | 13.7 | 3 1 5 4 1 | 0.35 | 13.2 | 4 1 6 3 2 | 0.22 | 9.8 |
| 4 3 3 4 4 | 0.58 | 17.54 | 5 2 1 3 2 | 0.46 | 16.22 | 2 3 3 3 1 | 0.35 | 12.05 | 2 2 6 3 3 | 0.22 | 8.94 |
| 5 1 2 2 2 | 0.58 | 19.99 | 2 2 4 1 3 | 0.46 | 14.77 | 1 2 2 3 3 | 0.35 | 12.79 | 5 3 6 4 1 | 0.22 | 10.38 |
| 5 2 2 4 3 | 0.58 | 17.61 | 2 3 4 2 3 | 0.46 | 13.37 | 4 3 2 3 1 | 0.35 | 12.37 | 1 2 6 1 4 | 0.22 | 12.01 |
| 1 1 2 4 2 | 0.58 | 22.89 | 4 1 5 4 1 | 0.46 | 15.98 | 1 1 4 1 3 | 0.35 | 17.05 | 1 3 6 2 4 | 0.22 | 10.36 |
| 2 2 3 1 4 | 0.58 | 19.23 | 2 1 5 2 1 | 0.46 | 16.61 | 3 1 5 2 2 | 0.35 | 11.93 | 5 2 6 1 2 | 0.21 | 10.31 |
| 2 3 3 2 4 | 0.58 | 17.59 | 4 1 5 2 2 | 0.46 | 14.79 | 4 3 3 3 2 | 0.35 | 11.28 | 5 3 6 2 2 | 0.21 | 9.41 |
| 4 2 2 1 4 | 0.58 | 20.18 | 4 2 5 4 3 | 0.46 | 13.22 | 5 3 1 3 1 | 0.35 | 15.73 | 1 3 6 4 2 | 0.21 | 10.76 |
| 2 3 2 4 1 | 0.58 | 19.68 | 2 2 5 2 3 | 0.46 | 13.36 | 3 2 5 4 3 | 0.35 | 10.87 | 3 1 5 3 2 | 0.21 | 9.38 |
| 4 3 2 2 4 | 0.58 | 18.36 | 3 1 3 1 4 | 0.45 | 16.32 | 4 3 4 1 3 | 0.35 | 12.85 | 1 1 5 3 3 | 0.21 | 11.22 |
| 5 2 1 1 4 | 0.58 | 24.03 | 5 1 5 4 4 | 0.45 | 13.96 | 1 3 1 3 2 | 0.35 | 16.81 | 4 3 5 3 3 | 0.21 | 9.17 |
| 2 3 3 4 2 | 0.58 | 17.64 | 3 1 2 1 2 | 0.45 | 16.69 | 5 3 2 3 4 | 0.35 | 11.49 | 4 1 6 3 3 | 0.21 | 9.67 |
| 5 3 1 2 4 | 0.58 | 21.31 | 3 3 2 4 3 | 0.45 | 13.58 | 4 1 5 1 1 | 0.35 | 15.57 | 3 2 6 1 4 | 0.21 | 10 |
| 1 3 1 4 4 | 0.58 | 25.91 | 5 2 4 4 1 | 0.45 | 14.93 | 1 1 5 2 3 | 0.34 | 14.18 | 3 3 6 2 4 | 0.21 | 8.94 |
| 4 3 2 4 2 | 0.58 | 18.01 | 2 3 5 4 4 | 0.45 | 13.39 | 4 1 4 3 1 | 0.34 | 13.37 | 5 3 5 1 1 | 0.21 | 11.71 |
| 2 2 2 1 2 | 0.58 | 20.15 | 1 2 4 2 4 | 0.45 | 15.81 | 4 2 5 1 3 | 0.34 | 12.33 | 3 3 6 4 2 | 0.21 | 9.09 |
| 2 3 2 2 2 | 0.58 | 18.49 | 3 3 1 1 4 | 0.45 | 19.72 | 4 3 5 2 3 | 0.34 | 11.39 | 5 3 4 3 1 | 0.21 | 10.07 |
| 5 3 1 4 2 | 0.58 | 21.25 | 5 1 3 1 3 | 0.45 | 16.37 | 4 2 4 3 3 | 0.34 | 11.15 | 5 1 6 1 1 | 0.21 | 12.78 |
| 2 1 4 4 1 | 0.58 | 20.72 | 5 2 4 2 2 | 0.45 | 13.96 | 5 1 5 1 4 | 0.34 | 13.05 | 1 3 5 1 2 | 0.21 | 12.55 |
| 4 1 4 2 4 | 0.58 | 18.64 | 1 2 4 4 2 | 0.45 | 16.17 | 4 1 6 2 3 | 0.34 | 12.01 | 1 3 4 3 2 | 0.21 | 10.54 |
| 4 1 4 4 2 | 0.58 | 18.72 | 2 1 6 4 4 | 0.45 | 14.22 | 5 1 4 3 4 | 0.34 | 11.98 | 5 2 6 1 3 | 0.21 | 10.05 |
| 2 1 4 2 2 | 0.57 | 19.02 | 1 1 2 1 3 | 0.45 | 19.92 | 3 3 2 1 3 | 0.34 | 12.61 | 1 1 6 1 2 | 0.21 | 13.31 |
| 2 2 4 4 3 | 0.57 | 16.84 | 3 2 3 2 1 | 0.45 | 14.8 | 5 2 4 1 1 | 0.34 | 14.38 | 5 3 6 2 3 | 0.21 | 9.19 |
| 3 1 1 2 1 | 0.57 | 27.36 | 2 3 3 1 3 | 0.45 | 14.52 | 5 3 4 2 1 | 0.34 | 12.64 | 1 3 6 4 3 | 0.21 | 10.45 |
| 3 1 3 4 4 | 0.57 | 17.96 | 3 1 4 4 3 | 0.45 | 13.89 | 1 3 4 4 1 | 0.34 | 14.68 | 2 3 6 1 1 | 0.21 | 11.38 |
| 3 2 1 2 3 | 0.57 | 20 | 4 3 2 1 3 | 0.45 | 15.53 | 2 3 5 1 4 | 0.34 | 12.44 | 5 2 5 3 1 | 0.21 | 9.77 |
| 3 1 2 2 4 | 0.57 | 18.76 | 5 3 1 1 3 | 0.45 | 19.07 | 2 3 4 3 4 | 0.34 | 11.06 | 4 3 6 1 2 | 0.21 | 10.44 |
| 3 1 2 4 2 | 0.57 | 18.51 | 3 2 1 3 4 | 0.45 | 15.55 | 1 2 4 1 2 | 0.34 | 15.79 | 1 2 5 3 2 | 0.2 | 10.33 |
| 2 1 1 3 3 | 0.57 | 21.79 | 2 1 3 3 1 | 0.45 | 15.67 | 1 3 4 2 2 | 0.34 | 13.26 | 2 2 6 3 1 | 0.2 | 9.66 |
| 3 3 1 4 4 | 0.57 | 20.32 | 4 1 2 3 1 | 0.45 | 16.07 | 2 1 6 1 4 | 0.34 | 13.26 | 3 1 5 3 3 | 0.2 | 9.15 |
| 5 1 3 4 3 | 0.57 | 18.39 | 4 1 3 3 2 | 0.45 | 14.27 | 3 1 2 3 1 | 0.34 | 12.97 | 4 2 6 3 2 | 0.2 | 8.86 |
| 4 1 3 1 4 | 0.57 | 20.73 | 5 1 1 3 1 | 0.45 | 21.55 | 3 1 3 3 2 | 0.34 | 11.51 | 3 3 5 1 2 | 0.2 | 10.18 |
| 5 1 2 2 3 | 0.57 | 19.01 | 2 2 3 3 3 | 0.45 | 12.91 | 5 2 5 2 1 | 0.34 | 12.5 | 3 3 4 3 2 | 0.2 | 8.82 |
| 1 1 2 4 3 | 0.57 | 21.58 | 4 2 2 3 3 | 0.45 | 13.34 | 1 2 5 4 1 | 0.34 | 14.44 | 3 1 6 1 2 | 0.2 | 10.54 |
| 2 1 2 1 1 | 0.57 | 24.31 | 4 1 4 1 3 | 0.45 | 16.17 | 3 2 2 3 3 | 0.34 | 10.8 | 3 3 6 4 3 | 0.2 | 8.85 |
| 2 1 3 1 2 | 0.57 | 20.36 | 5 2 1 3 3 | 0.45 | 15.97 | 3 1 4 1 3 | 0.34 | 12.95 | 1 3 5 1 3 | 0.2 | 11.91 |
| 2 3 3 4 3 | 0.57 | 16.65 | 1 1 1 3 2 | 0.45 | 23.65 | 2 2 5 3 4 | 0.34 | 10.79 | 1 3 4 3 3 | 0.2 | 10.3 |
| 1 1 1 1 4 | 0.57 | 41.09 | 2 3 1 3 1 | 0.45 | 18.23 | 1 2 5 2 2 | 0.34 | 13.28 | 3 2 5 3 2 | 0.2 | 8.65 |
| 4 1 2 1 2 | 0.57 | 21.36 | 5 1 2 3 4 | 0.44 | 14.37 | 1 1 3 3 3 | 0.34 | 14.09 | 1 1 6 1 3 | 0.2 | 12.68 |
| 4 3 2 4 3 | 0.57 | 17.26 | 5 3 3 4 1 | 0.44 | 14.94 | 3 3 1 3 2 | 0.34 | 13 | 1 1 5 3 1 | 0.2 | 12.49 |
| 2 2 2 1 3 | 0.57 | 18.7 | 1 2 3 1 4 | 0.44 | 18.27 | 4 2 6 4 1 | 0.34 | 12.07 | 4 3 6 1 3 | 0.2 | 10.15 |
| 5 1 1 1 2 | 0.57 | 26.72 | 5 2 2 1 1 | 0.44 | 16.98 | 2 2 6 2 1 | 0.34 | 12.28 | 1 2 5 3 3 | 0.2 | 10.12 |
| 2 3 2 2 3 | 0.57 | 17.26 | 1 3 3 2 4 | 0.44 | 15.69 | 3 1 5 2 3 | 0.34 | 11.4 | 4 3 5 3 1 | 0.2 | 9.76 |
| 5 3 1 4 3 | 0.57 | 20.41 | 4 3 1 3 2 | 0.44 | 16.12 | 4 3 3 3 3 | 0.34 | 11.13 | 4 1 6 3 1 | 0.2 | 10.52 |
| 4 3 1 1 4 | 0.56 | 24.75 | 5 3 2 2 1 | 0.44 | 15.37 | 4 2 6 2 2 | 0.34 | 11.13 | 4 2 6 3 3 | 0.2 | 8.79 |
| 4 2 3 2 1 | 0.56 | 18.84 | 1 3 2 4 1 | 0.44 | 17.23 | 1 3 1 3 3 | 0.33 | 16.49 | 5 3 5 3 4 | 0.19 | 8.94 |
| 2 3 1 1 2 | 0.56 | 23.82 | 5 2 3 1 2 | 0.44 | 15.04 | 5 2 6 4 4 | 0.33 | 10.86 | 5 1 6 3 4 | 0.19 | 9.33 |
| 4 1 4 4 3 | 0.56 | 17.82 | 5 3 3 2 2 | 0.44 | 13.82 | 5 3 3 1 1 | 0.33 | 14.28 | 5 2 6 1 1 | 0.19 | 11.12 |
| 1 2 1 2 1 | 0.56 | 31.55 | 1 3 3 4 2 | 0.44 | 15.97 | 1 3 2 1 1 | 0.33 | 17.05 | 5 3 6 2 1 | 0.19 | 9.93 |
| 2 1 4 2 3 | 0.56 | 17.61 | 4 1 5 2 3 | 0.44 | 14.13 | 1 3 3 1 2 | 0.33 | 15.38 | 1 3 6 4 1 | 0.19 | 11.38 |
| 4 2 1 3 4 | 0.56 | 19.83 | 2 3 2 3 4 | 0.44 | 13.5 | 3 3 4 4 1 | 0.33 | 12 | 2 3 6 3 4 | 0.19 | 8.78 |
| 5 2 3 2 4 | 0.56 | 16.98 | 1 2 2 1 2 | 0.44 | 18.23 | 5 2 3 3 1 | 0.33 | 11.83 | 1 2 6 1 2 | 0.19 | 11.67 |
| 1 2 3 4 4 | 0.56 | 19.34 | 1 3 2 2 2 | 0.44 | 15.89 | 3 2 4 1 2 | 0.33 | 12.35 | 1 3 6 2 2 | 0.19 | 10.11 |
| 5 2 2 4 1 | 0.56 | 18.45 | 3 2 4 2 4 | 0.44 | 13.07 | 3 3 4 2 2 | 0.33 | 10.95 | 3 3 5 1 3 | 0.19 | 9.76 |
| 2 2 1 3 2 | 0.56 | 19.95 | 3 2 4 4 2 | 0.44 | 13.1 | 1 2 2 3 1 | 0.33 | 13.49 | 3 3 4 3 3 | 0.19 | 8.62 |
| 5 2 3 4 2 | 0.56 | 16.82 | 3 1 2 1 3 | 0.44 | 15.75 | 1 1 4 1 1 | 0.33 | 21.14 | 3 1 6 1 3 | 0.19 | 10.14 |
| 1 2 2 2 4 | 0.56 | 19.86 | 5 1 4 2 1 | 0.44 | 16.51 | 1 2 3 3 2 | 0.33 | 12.53 | 3 1 5 3 1 | 0.19 | 10.03 |
| 5 2 2 2 2 | 0.56 | 17.52 | 1 1 4 4 1 | 0.44 | 19.98 | 3 2 5 4 1 | 0.33 | 11.79 | 3 2 5 3 3 | 0.19 | 8.48 |
| 1 2 2 4 2 | 0.56 | 19.63 | 2 1 5 1 4 | 0.44 | 15.18 | 1 2 4 1 3 | 0.33 | 14.89 | 3 3 6 4 1 | 0.19 | 9.61 |
| 3 1 2 4 3 | 0.56 | 17.56 | 2 1 4 3 4 | 0.44 | 13.86 | 4 3 4 1 1 | 0.33 | 14.14 | 1 3 5 1 1 | 0.19 | 13.65 |
| 2 1 5 4 4 | 0.56 | 17.02 | 5 2 4 2 3 | 0.44 | 13.4 | 1 3 4 2 3 | 0.33 | 12.64 | 3 2 6 1 2 | 0.19 | 9.61 |
| 3 1 1 1 4 | 0.56 | 25.87 | 1 1 4 2 2 | 0.44 | 17.53 | 3 2 5 2 2 | 0.33 | 10.9 | 3 3 6 2 2 | 0.19 | 8.65 |
| 2 2 4 4 1 | 0.56 | 18.02 | 1 2 4 4 3 | 0.44 | 15.4 | 3 1 3 3 3 | 0.33 | 11.26 | 1 3 4 3 1 | 0.19 | 10.93 |
| 4 2 4 2 4 | 0.56 | 16.66 | 4 3 4 4 1 | 0.44 | 14.49 | 1 1 5 2 1 | 0.33 | 16.44 | 1 1 6 1 1 | 0.19 | 15.27 |
| 4 2 4 4 2 | 0.55 | 16.55 | 2 2 4 1 1 | 0.44 | 16.5 | 4 1 5 3 4 | 0.33 | 11.29 | 1 2 6 1 3 | 0.18 | 11.27 |
| 2 1 3 1 3 | 0.55 | 18.9 | 2 3 4 2 1 | 0.44 | 14.47 | 4 2 5 1 1 | 0.33 | 13.66 | 4 3 6 1 1 | 0.18 | 11.26 |
| 2 2 4 2 2 | 0.55 | 16.92 | 4 2 4 1 2 | 0.44 | 15.12 | 5 3 4 1 4 | 0.33 | 12.69 | 1 3 6 2 3 | 0.18 | 9.82 |
| 4 1 2 1 3 | 0.55 | 20.22 | 4 3 4 2 2 | 0.44 | 13.49 | 1 2 5 2 3 | 0.33 | 12.7 | 1 2 5 3 1 | 0.18 | 10.89 |
| 5 1 1 1 3 | 0.55 | 25.22 | 4 2 5 4 1 | 0.44 | 14.07 | 4 3 5 2 1 | 0.33 | 12.32 | 5 3 6 1 4 | 0.18 | 9.97 |
| 3 2 1 2 1 | 0.55 | 22.68 | 5 3 4 4 4 | 0.44 | 13.34 | 2 1 5 3 2 | 0.33 | 11.57 | 4 2 6 3 1 | 0.18 | 9.32 |
| 2 3 1 1 3 | 0.55 | 21.79 | 2 2 5 2 1 | 0.44 | 14.67 | 4 2 4 3 1 | 0.33 | 11.72 | 5 2 6 3 4 | 0.18 | 8.52 |
| 3 2 3 4 4 | 0.55 | 16.08 | 3 1 1 3 2 | 0.44 | 16.64 | 3 3 1 3 3 | 0.33 | 12.72 | 3 3 5 1 1 | 0.18 | 10.99 |
| 3 2 2 2 4 | 0.55 | 16.76 | 4 2 5 2 2 | 0.44 | 13.29 | 4 1 6 2 1 | 0.33 | 13.35 | 3 3 4 3 1 | 0.18 | 9.18 |
| 2 1 1 3 1 | 0.55 | 25.85 | 4 1 3 3 3 | 0.43 | 13.99 | 3 3 2 1 1 | 0.32 | 14.06 | 3 1 6 1 1 | 0.18 | 11.73 |
| 3 2 2 4 2 | 0.55 | 16.4 | 3 2 3 1 4 | 0.43 | 14.68 | 5 2 5 1 4 | 0.32 | 11.92 | 3 2 6 1 3 | 0.18 | 9.33 |
| 5 1 3 4 1 | 0.55 | 19.88 | 3 3 3 2 4 | 0.43 | 13.15 | 4 2 6 2 3 | 0.32 | 10.84 | 3 3 6 2 3 | 0.18 | 8.42 |
| 1 1 3 2 4 | 0.55 | 21.16 | 3 3 2 4 1 | 0.43 | 14.54 | 5 3 5 2 4 | 0.32 | 11.1 | 3 2 5 3 1 | 0.18 | 9.1 |
| 4 1 1 3 2 | 0.55 | 21.57 | 5 2 5 4 4 | 0.43 | 12.66 | 1 3 5 4 4 | 0.32 | 12.65 | 1 3 5 3 4 | 0.17 | 9.79 |
| 5 1 2 2 1 | 0.55 | 20.84 | 3 3 3 4 2 | 0.43 | 13.13 | 3 3 3 1 2 | 0.32 | 12.34 | 5 3 5 3 2 | 0.17 | 8.83 |
| 1 1 2 4 1 | 0.55 | 24.01 | 1 1 1 3 3 | 0.43 | 22.98 | 5 2 4 3 4 | 0.32 | 10.81 | 1 1 6 3 4 | 0.17 | 10.26 |
| 2 2 1 3 3 | 0.55 | 18.96 | 3 2 2 1 2 | 0.43 | 14.84 | 5 3 5 4 2 | 0.32 | 11.25 | 5 1 6 3 2 | 0.17 | 9.21 |
| 5 1 3 2 2 | 0.55 | 18.18 | 5 1 3 1 1 | 0.43 | 18.64 | 5 1 6 2 4 | 0.32 | 11.59 | 1 2 6 1 1 | 0.17 | 12.75 |
| 5 2 3 4 3 | 0.55 | 16.27 | 3 3 2 2 2 | 0.43 | 13.4 | 1 1 6 4 4 | 0.32 | 13.44 | 1 3 6 2 1 | 0.17 | 10.68 |
| 1 1 3 4 2 | 0.55 | 21.51 | 4 3 1 3 3 | 0.43 | 15.84 | 5 1 6 4 2 | 0.32 | 11.85 | 4 3 6 3 4 | 0.17 | 8.59 |
| 2 1 2 3 4 | 0.55 | 17.6 | 1 1 2 1 1 | 0.43 | 24.12 | 4 3 6 4 4 | 0.32 | 10.92 | 2 3 6 3 2 | 0.17 | 8.59 |
| 4 2 3 1 4 | 0.55 | 18.38 | 5 2 3 1 3 | 0.43 | 14.55 | 1 3 3 1 3 | 0.32 | 14.73 | 3 3 5 3 4 | 0.17 | 8.38 |
| 2 3 3 4 1 | 0.55 | 17.76 | 1 1 3 1 2 | 0.43 | 20.46 | 2 2 6 1 4 | 0.32 | 12.01 | 3 1 6 3 4 | 0.17 | 8.64 |
| 4 3 3 2 4 | 0.55 | 16.66 | 5 3 3 2 3 | 0.43 | 13.38 | 3 2 2 3 1 | 0.32 | 11.44 | 3 2 6 1 1 | 0.17 | 10.41 |
| 5 2 2 2 3 | 0.55 | 16.8 | 1 3 3 4 3 | 0.43 | 15.38 | 2 3 6 2 4 | 0.32 | 10.84 | 3 3 6 2 1 | 0.17 | 9.14 |
| 1 1 2 2 2 | 0.55 | 21.72 | 2 2 6 4 4 | 0.43 | 12.79 | 3 1 4 1 1 | 0.32 | 14.99 | 5 3 5 3 3 | 0.17 | 8.69 |
| 1 2 2 4 3 | 0.55 | 18.71 | 2 3 3 1 1 | 0.43 | 16.11 | 3 2 3 3 2 | 0.32 | 10.4 | 5 1 6 3 3 | 0.17 | 9.1 |
| 4 3 2 4 1 | 0.55 | 18.1 | 3 1 4 4 1 | 0.43 | 15.28 | 2 3 6 4 2 | 0.32 | 11.08 | 2 3 6 3 3 | 0.17 | 8.34 |
| 2 2 2 1 1 | 0.55 | 20.75 | 1 2 2 1 3 | 0.43 | 17.25 | 1 1 3 3 1 | 0.32 | 15.52 | 1 3 6 1 4 | 0.16 | 11.13 |
| 2 3 2 2 1 | 0.55 | 18.65 | 4 3 2 1 1 | 0.43 | 16.98 | 3 2 4 1 3 | 0.32 | 11.79 | 5 3 6 1 2 | 0.16 | 9.75 |
| 4 3 3 4 2 | 0.55 | 16.48 | 1 3 2 2 3 | 0.43 | 15.14 | 3 3 4 2 3 | 0.32 | 10.51 | 1 2 6 3 4 | 0.16 | 9.25 |
| 5 3 1 4 1 | 0.55 | 22.62 | 4 3 3 1 2 | 0.43 | 14.99 | 1 2 3 3 3 | 0.32 | 12.36 | 5 2 6 3 2 | 0.16 | 8.36 |
| 2 2 3 1 2 | 0.55 | 18.04 | 5 3 1 1 1 | 0.43 | 23.06 | 3 1 5 2 1 | 0.32 | 12.79 | 3 3 6 1 4 | 0.16 | 9.41 |
| 2 3 3 2 2 | 0.55 | 16.53 | 3 1 4 2 2 | 0.43 | 13.75 | 4 3 3 3 1 | 0.32 | 11.66 | 5 3 6 1 3 | 0.16 | 9.49 |
| 1 2 1 1 4 | 0.55 | 31.84 | 3 2 4 4 3 | 0.43 | 12.56 | 3 2 5 2 3 | 0.32 | 10.49 | 3 2 6 3 4 | 0.16 | 7.99 |
| 4 2 2 1 2 | 0.55 | 18.69 | 1 3 1 1 2 | 0.43 | 26.3 | 1 3 1 3 1 | 0.32 | 18.88 | 5 3 5 3 1 | 0.16 | 9.27 |
| 1 3 1 2 4 | 0.55 | 24.44 | 5 3 2 1 4 | 0.43 | 15.21 | 5 3 3 3 4 | 0.32 | 10.75 | 5 1 6 3 1 | 0.16 | 9.9 |
| 4 3 2 2 2 | 0.55 | 17.08 | 2 2 3 3 1 | 0.43 | 13.69 | 1 3 2 3 4 | 0.32 | 12.24 | 1 3 5 3 2 | 0.16 | 9.69 |
| 5 2 1 1 2 | 0.54 | 22.59 | 4 2 2 3 1 | 0.43 | 13.9 | 2 1 5 3 3 | 0.31 | 11.02 | 5 2 6 3 3 | 0.16 | 8.3 |
| 5 3 1 2 2 | 0.54 | 20.08 | 4 1 4 1 1 | 0.43 | 18.47 | 3 3 5 4 4 | 0.31 | 10.64 | 1 1 6 3 2 | 0.15 | 10.12 |
| 1 3 1 4 2 | 0.54 | 24.86 | 1 1 4 2 3 | 0.43 | 16.47 | 5 3 2 3 2 | 0.31 | 11.03 | 2 3 6 3 1 | 0.15 | 9 |
| 5 3 2 4 4 | 0.54 | 16.64 | 4 2 3 3 2 | 0.43 | 12.67 | 3 1 6 4 4 | 0.31 | 11.07 | 4 3 6 3 2 | 0.15 | 8.37 |
| 4 1 4 4 1 | 0.54 | 19.23 | 5 2 1 3 1 | 0.43 | 17.49 | 1 1 5 1 4 | 0.31 | 15.4 | 3 3 5 3 2 | 0.15 | 8.19 |
| 2 1 4 2 1 | 0.54 | 19.59 | 4 2 4 1 3 | 0.43 | 14.46 | 3 3 3 1 3 | 0.31 | 11.89 | 3 1 6 3 2 | 0.15 | 8.43 |
| 4 1 4 2 2 | 0.54 | 17.71 | 4 3 4 2 3 | 0.43 | 12.95 | 1 1 4 3 4 | 0.31 | 13.34 | 1 3 5 3 3 | 0.15 | 9.49 |
| 4 2 4 4 3 | 0.54 | 15.87 | 1 2 1 3 2 | 0.42 | 19.06 | 5 1 5 1 2 | 0.31 | 12.88 | 1 1 6 3 3 | 0.15 | 9.97 |
| 2 2 4 2 3 | 0.54 | 15.83 | 5 2 2 3 4 | 0.42 | 12.81 | 5 3 5 4 3 | 0.31 | 10.87 | 4 3 6 3 3 | 0.15 | 8.3 |
| 5 1 4 4 4 | 0.54 | 17.08 | 5 1 4 1 4 | 0.42 | 15.72 | 5 1 4 3 2 | 0.31 | 11.75 | 5 3 6 1 1 | 0.15 | 10.5 |
| 2 3 4 4 4 | 0.54 | 15.91 | 4 1 5 2 1 | 0.42 | 15.66 | 1 2 4 1 1 | 0.31 | 17.05 | 1 3 6 1 2 | 0.15 | 10.84 |
| 3 1 3 2 4 | 0.54 | 17.02 | 3 1 1 3 3 | 0.42 | 16.16 | 4 3 5 1 4 | 0.31 | 12.17 | 5 2 6 3 1 | 0.15 | 8.81 |
| 3 1 2 4 1 | 0.54 | 19.22 | 4 2 5 2 3 | 0.42 | 12.79 | 1 3 4 2 1 | 0.31 | 13.72 | 1 2 6 3 2 | 0.14 | 9.06 |
| 3 1 3 4 2 | 0.54 | 16.94 | 2 3 4 1 4 | 0.42 | 14.39 | 5 1 6 4 3 | 0.31 | 11.49 | 3 3 5 3 3 | 0.14 | 8.04 |
| 3 1 2 2 2 | 0.54 | 17.51 | 3 1 2 1 1 | 0.42 | 18.23 | 4 3 4 3 4 | 0.31 | 10.68 | 3 1 6 3 3 | 0.14 | 8.3 |
| 3 2 2 4 3 | 0.54 | 15.68 | 5 1 5 2 4 | 0.42 | 13.55 | 3 1 3 3 1 | 0.31 | 12.23 | 3 3 6 1 2 | 0.14 | 9.08 |
| 2 2 5 4 4 | 0.54 | 15.41 | 1 1 5 4 4 | 0.42 | 15.65 | 4 1 6 1 4 | 0.31 | 12.98 | 1 3 6 1 3 | 0.14 | 10.46 |
| 4 1 1 3 3 | 0.54 | 21.07 | 3 1 3 1 2 | 0.42 | 15.4 | 2 3 5 1 2 | 0.31 | 12.12 | 1 3 5 3 1 | 0.14 | 10.18 |
| 3 2 1 1 4 | 0.54 | 22.45 | 3 3 3 4 3 | 0.42 | 12.68 | 2 3 4 3 2 | 0.31 | 10.72 | 3 2 6 3 2 | 0.14 | 7.76 |
| 3 3 1 2 4 | 0.54 | 19.14 | 5 1 5 4 2 | 0.42 | 13.71 | 3 2 3 3 3 | 0.31 | 10.23 | 1 1 6 3 1 | 0.14 | 10.95 |
| 5 1 3 2 3 | 0.54 | 17.46 | 3 2 2 1 3 | 0.42 | 14.15 | 2 1 6 1 2 | 0.31 | 12.9 | 1 2 6 3 3 | 0.14 | 8.98 |
| 1 1 3 4 3 | 0.53 | 20.51 | 3 3 2 2 3 | 0.42 | 12.83 | 2 3 6 4 3 | 0.31 | 10.54 | 4 3 6 3 1 | 0.14 | 8.8 |
| 2 1 3 1 1 | 0.53 | 21.69 | 5 2 4 2 1 | 0.42 | 14.33 | 1 2 5 2 1 | 0.31 | 14.06 | 5 3 6 3 4 | 0.14 | 8.12 |
| 3 3 1 4 2 | 0.53 | 18.98 | 1 2 4 4 1 | 0.42 | 16.66 | 4 2 5 3 4 | 0.31 | 10.31 | 3 3 6 1 3 | 0.13 | 8.81 |
| 4 1 2 1 1 | 0.53 | 22.9 | 4 3 5 4 4 | 0.42 | 12.67 | 3 3 1 3 1 | 0.31 | 14.16 | 3 3 5 3 1 | 0.13 | 8.63 |
| 1 1 2 2 3 | 0.53 | 20.42 | 2 2 5 1 4 | 0.42 | 13.88 | 2 2 5 3 2 | 0.31 | 10.51 | 3 1 6 3 1 | 0.13 | 9.05 |
| 4 1 3 1 2 | 0.53 | 19.5 | 2 3 5 2 4 | 0.42 | 12.84 | 4 2 6 2 1 | 0.31 | 11.68 | 3 2 6 3 3 | 0.13 | 7.68 |
| 5 1 1 1 1 | 0.53 | 33.4 | 2 2 4 3 4 | 0.42 | 12.51 | 3 3 2 3 4 | 0.31 | 10.56 | 1 3 6 1 1 | 0.13 | 11.73 |
| 4 3 3 4 3 | 0.53 | 15.93 | 4 1 6 4 4 | 0.42 | 13.43 | 5 2 6 2 4 | 0.3 | 10.5 | 1 2 6 3 1 | 0.13 | 9.56 |
| 2 2 3 1 3 | 0.53 | 16.94 | 1 1 3 1 3 | 0.42 | 19.31 | 1 2 6 4 4 | 0.3 | 11.91 | 3 3 6 1 1 | 0.13 | 9.8 |
| 2 3 3 2 3 | 0.53 | 15.59 | 2 3 5 4 2 | 0.42 | 13.01 | 1 3 3 1 1 | 0.3 | 16.69 | 3 2 6 3 1 | 0.12 | 8.19 |
| 4 2 2 1 3 | 0.53 | 17.87 | 1 2 4 2 2 | 0.42 | 15.25 | 3 1 5 1 4 | 0.3 | 12.2 | 1 3 6 3 4 | 0.12 | 8.71 |
| 4 3 2 2 3 | 0.53 | 16.35 | 2 1 6 2 4 | 0.42 | 13.53 | 5 2 6 4 2 | 0.3 | 10.59 | 5 3 6 3 2 | 0.12 | 7.98 |
| 5 2 1 1 3 | 0.53 | 21.62 | 3 3 1 1 2 | 0.42 | 18.21 | 5 3 2 3 3 | 0.3 | 10.82 | 3 3 6 3 4 | 0.12 | 7.61 |
| 1 1 1 1 2 | 0.53 | 40.73 | 2 1 6 4 2 | 0.42 | 13.83 | 3 1 4 3 4 | 0.3 | 10.81 | 5 3 6 3 3 | 0.12 | 7.92 |
| 5 3 1 2 3 | 0.53 | 19.25 | 4 3 3 1 3 | 0.42 | 14.48 | 3 2 4 1 1 | 0.3 | 13.14 | 5 3 6 3 1 | 0.11 | 8.4 |
| 1 3 1 4 3 | 0.53 | 23.58 | 3 1 4 2 3 | 0.42 | 13.07 | 3 3 4 2 1 | 0.3 | 11.34 | 1 3 6 3 2 | 0.11 | 8.55 |
| 2 3 1 1 1 | 0.53 | 26.69 | 1 3 1 1 3 | 0.42 | 24.33 | 1 2 3 3 1 | 0.3 | 13.1 | 3 3 6 3 2 | 0.1 | 7.42 |
| 5 1 2 1 4 | 0.53 | 19.48 | 4 1 3 3 1 | 0.42 | 14.98 | 5 1 5 1 3 | 0.3 | 12.3 | 1 3 6 3 3 | 0.1 | 8.46 |
| 4 3 1 1 2 | 0.53 | 22.89 | 3 2 1 3 2 | 0.41 | 14.54 | 5 1 4 3 3 | 0.3 | 11.46 | 3 3 6 3 3 | 0.1 | 7.33 |
| 2 3 2 1 4 | 0.53 | 18.28 | 4 2 3 3 3 | 0.41 | 12.48 | 3 2 5 2 1 | 0.3 | 11.47 | 1 3 6 3 1 | 0.1 | 8.97 |
| 4 1 4 2 3 | 0.53 | 16.84 | 1 1 1 3 1 | 0.41 | 30.47 | 2 3 5 1 3 | 0.3 | 11.33 | 3 3 6 3 1 | 0.09 | 7.81 |
